## RESEARCH ARTICLE

# Contrast of oropharyngeal leak pressure and clinical performance of I-gel™ and LMA ProSeal™ in patients: A meta-analysis

Yuan Tan<sup>1,2</sup>, Jingyao Jiang<sup>1,2</sup>, Rurong Wang<sup>1,2\*</sup>

**1** Departments of Anesthesiology, West China Hospital of Sichuan University, Chengdu, China, **2** Laboratory of Anesthesia and Critical Care Medicine, Translational Neuroscience Center, West China Hospital, Sichuan University, Chengdu, China

\* [wangrurong@scu.edu.cn](mailto:wangrurong@scu.edu.cn)

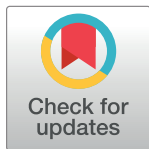

## Abstract

### Background

Conflicting outcomes have been reported for the i-gel™ and laryngeal mask airway (LMA) ProSeal™ in children and adults during general anesthesia. Randomized controlled trials (RCTs) that yielded wide contrast outcomes between i-gel™ and LMA ProSeal™ were included in this meta-analysis.

### Methods

Two authors independently identified RCTs that compared i-gel™ with LMA ProSeal™ among patients receiving general anesthesia by performing searches in EMBASE, Cochrane, PubMed, and ScienceDirect. Discussion was adopted to resolve disagreements. Data were counted with Review Manager 5.3 and pooled by applying weighted mean difference (MD) and risk ratio (RR), and related 95% confidence intervals.

### Results

A total of 33 RCTs with 2605 patients were included in the meta-analysis. I-gel™ provided a considerably lower oropharyngeal leak pressure [weighted average diversity (MD) = -1.53 (-2.89, -0.17),  $P = 0.03$ ], incidence of blood staining on the [supraglottic airway devices](#) [RR = 0.44, (0.28, 0.69),  $P = 0.0003$ ], sore throat [RR = 0.31 (0.18, 0.52),  $P < 0.0001$ ], and a short insertion time [MD = -5.61 (-7.71, -3.51),  $P < 0.00001$ ] than LMA ProSeal™. Compared with LMA ProSeal™, i-gel™ offered a significantly higher first-insertion success rate [RR = 1.03 (1.00, 1.06),  $P = 0.03$ ] and ease of insertion [RR = 1.06 (1.01, 1.11),  $P = 0.03$ ]. The gastric-tube-placement first insertion rate [RR = 1.04 (0.99, 1.10),  $P = 0.11$ ], laryngospasm [RR = 0.76 (0.17, 3.31),  $P = 0.72$ ], and cough [RR = 1.30 (0.49, 3.44),  $P = 0.60$ ] between the two devices were similar.

### Conclusions

Both devices could achieve a good seal to provide adequate ventilation. Compared with the used LMA ProSeal™, the i-gel™ was found to have fewer complications (blood staining,

## OPEN ACCESS

**Citation:** Tan Y, Jiang J, Wang R (2022) Contrast of oropharyngeal leak pressure and clinical performance of I-gel™ and LMA ProSeal™ in patients: A meta-analysis. PLoS ONE 17(12): e0278871. <https://doi.org/10.1371/journal.pone.0278871>

**Editor:** Alexander Wolf, University Hospital Knappschaftskrankenhaus Bochum, GERMANY

**Received:** May 7, 2022

**Accepted:** November 24, 2022

**Published:** December 15, 2022

**Copyright:** © 2022 Tan et al. This is an open access article distributed under the terms of the [Creative Commons Attribution License](#), which permits unrestricted use, distribution, and reproduction in any medium, provided the original author and source are credited.

**Data Availability Statement:** All relevant data are within the manuscript.

**Funding:** The author(s) received no specific funding for this work.

**Competing interests:** The authors have declared that no competing interests exist.

sore throat) and offers certain advantages (short insertion time, higher first-insertion success rate and ease of insertion) in patients under general anesthesia.

## Introduction

The common modality of airway administration in pediatric and adult patients for short surgical operations during general anesthesia is [Supraglottic airway device](#) (SAD) [1, 2]. Sufficient ventilation, delivery of anesthetic agents and oxygenation are provided with low-risk respiratory [adverse events](#), displacing the demand for traditional [tracheal intubation](#) [3]. The second-generation SADs with a gastric drain tube have been recommended to decrease the danger of reflux and [aspiration](#) of the first-generation tools [4]. I-gel™ and LMA ProSeal™ belong to second-generation SADs.

Given the single-use supraglottic airway, i-gel™ shows a total insertion success rate of 100% with an anatomically designed and noninflatable mask made of a gel-like thermoplastic elastomer; a broadened and flattened stem with a hard bite block is adopted to decrease the axial rotation and malpositioning as a buccal stabilizer, and a port is provided for gastric tube interpolation [5]. The laryngeal mask airway (LMA) ProSeal™ is a laryngeal mask tool with an altered cuff and a drain tube. If inflated, its altered cuff presses the bowl of the tool forwards while improving the seal in virtue of the larynx [6].

To quantify the effectiveness of airway sealing and protecting airway in tools, oropharyngeal leak pressure (OLP) is adopted [7, 8]. Several randomized controlled trials (RCTs) have reported to compare i-gel™ with LMA ProSeal™. Seven RCTs [9–15] observed higher OLP values in i-gel™ compared with LMA ProSeal™. However, 15 studies [16–30] recorded lower OLP values in i-gel™ compared with LMA ProSeal™, and 8 other research [3, 31–37] found no difference. Therefore, RCTs alone cannot sufficiently offer adequate insights into the clinical applications of i-gel™ and LMA ProSeal™.

To compare the superior airway sealing and certain advantages in patients under general anesthesia between the two SADs, 33 randomized controlled trials (RCTs) that yielded wide contrast outcomes between i-gel™ and LMA ProSeal™ were included in this meta-analysis. OLP was the primary result, and the first insertion success rate, insertion ease, intubation time, gastric-tube first insertion rate, and adverse events related to the SADs were the secondary results. In addition, subgroups analysis were performed in consideration of confounding elements, including age, type of operation, neuromuscular blocker (NMB) application, and the evaluation approach for OLP.

## Materials and approaches

The registration of meta-analysis was performed in PROSPERO (CRD42022312261), in [inplasy.com](https://www.inplasy.com) (INPLASY2022100013) and on the foundation of the Preferred Reporting Items for Systematic Reviews and Meta-Analyses reports [38].

## Literature search

Eligible studies were made by searching e-databases EMBASE, Cochrane, PubMed, and the ScienceDirect. All studies were made in April 2022. The search items are shown below: (a) “i-gel™” and “i-gel™ laryngeal mask”; (b) “Laryngeal Mask Airway ProSeal,” “PLMA,” and “LMA ProSeal™”; (c) “random controlled trial,” “random,” and “randomly.” The pivotal words were connected applying “AND” (for “i-gel™,” “ProSeal Laryngeal Mask Airway,” and

“randomized”) and “OR” (for “i-gel™” and “i-gel™ laryngeal mask”). The search was performed in English.

### Research selection

Only published prospective RCTs that compared i-gel™ with LMA ProSeal™ were included. Case reports, correspondence, reviews, manikin research, animal studies, and non-English articles were excluded.

### Data collection

The information below were gathered: the first author’s name, year of publication, the number of patients, age, type of operation, NMB application, premedication, mode of ventilation, evaluation approach for OLP, first-insertion success rate, ease of insertion, device insertion time, gastric-tube first-insertion success rate, and adverse events related to the SADs (sore throat, laryngospasm, blood-soiled devices, and cough). The information was collected by two independent authors (Yuan Tan and Jingyao Jiang). Discussion was adopted to resolve disagreements.

### Risk of bias evaluation

The risk of bias in RCTs was evaluated by using Cochrane collaboration standards. The criteria were as follows: randomization, concealment of allocation, blinding, incomplete data, selective reporting, and other bias. Each item was judged to be at high, unclear, or low risk of material bias.

### Statistical analysis

Data were counted with Review Manager 5.3 and pooled by applying weighted mean difference (MD) and risk ratio (RR), and related 95% confidence intervals. The random-effects model was applied if  $I^2 > 50\%$ , which indicated high heterogeneity, and the fixed-effects model was used when  $I^2 < 50\%$ . Possible explanations for great heterogeneity were searched for with a sensitivity analysis. Subgroups were explored in consideration of confounding elements, including age, kind of operation, NMB application, and the promising role of the evaluation approach for OLP. Inspection of funnel plots (if the number of trials was beyond 10) was adopted to test the publication bias of including articles by visually.

## Results

[Fig 1](#) illustrates the particular procedures and research selection. The initial search yielded 691 articles (PubMed = 52, Embase = 96, ScienceDirect = 463, Cochrane Library = 80). After excluding duplications, 301 studies were examined. Next, 260 of the 301 studies were excluded because of unrelated studies and reviews. Apart from 1 not retrieved report, the remaining 40 studies were continued to be examined. Then, 7 of 40 studies were excluded based on the exclusion criteria. Finally, a total of 33 studies were included in this meta-analysis [[3](#), [9–37](#), [39–41](#)]. [Tables 1](#) and [2](#) show the features and methodological quality of RCTs, respectively.

### 1. OLP

According to the pooled analysis of data from 30 trials [[3](#), [9–37](#)], i-gel™ offered a considerably lower OLP than LMA ProSeal™ [MD = -1.53 (-2.89, -0.17),  $I^2 = 97\%$ ,  $P = 0.03$ ] ([Fig 2](#)). Upon certification by sensitivity analysis, the pooled result was not altered by a single research. In consideration of substantial heterogeneity, the influence of confounding elements was

## PRISMA 2020 flow diagram for new systematic reviews which included searches of databases and registers only

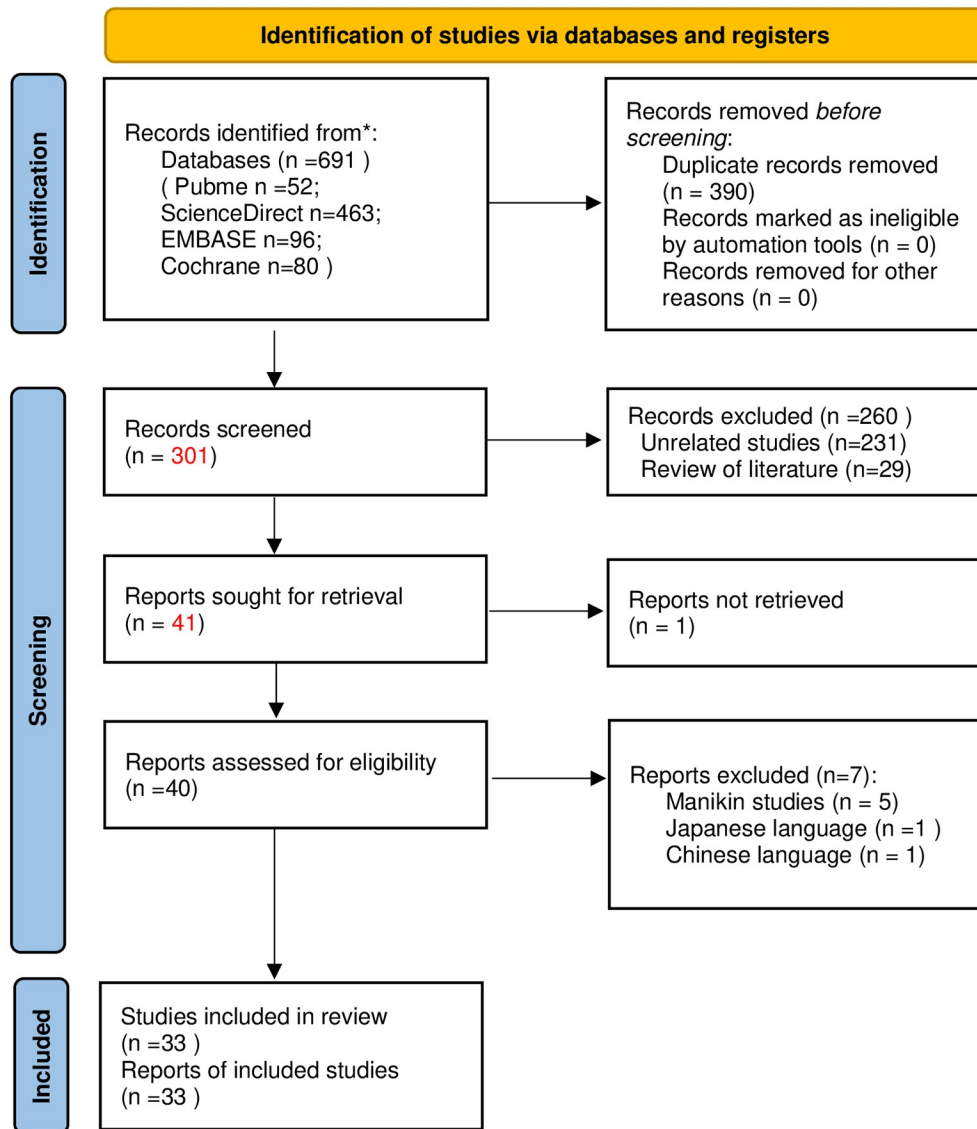

\*Consider, if feasible to do so, reporting the number of records identified from each database or register searched (rather than the total number across all databases/register).

\*\*If automation tools were used, indicate how many records were excluded by a human and how many were excluded by automation tools.

From: Page MJ, McKenzie JE, Bossuyt PM, Boutron I, Hoffmann TC, Mulrow CD, et al. The PRISMA 2020 statement: an updated guideline for reporting systematic reviews. *BMJ* 2021;372:n71. doi: 10.1136/bmj.n71

For more information, visit: <http://www.prisma-statement.org/>

**Fig 1. Flow chart of meta-analysis.**

<https://doi.org/10.1371/journal.pone.0278871.g001>

**Table 1. Characteristics of included trials.**

| Surgery                                                                                                | Premedication                   | NMB                         | Ventilation | OLP measurement | Author/Year           | Age         | Group             | OLP measurement | Ventilation         | NMB                       | Premedication                      | Surgery                                           |
|--------------------------------------------------------------------------------------------------------|---------------------------------|-----------------------------|-------------|-----------------|-----------------------|-------------|-------------------|-----------------|---------------------|---------------------------|------------------------------------|---------------------------------------------------|
| Elective hernioplasty, laparoscopic cholecystectomy, tibial plating, humerus plating and skin grafting | Midazolam 1mg IV                | Rocuronium 0.9 mg/kg        | Controlled  | Audible leak    | Singh [17] 2009       | adult       | i-gel LMA-ProSeal | Manometer       | Controlled          | No                        | Midazolam 0.3mg/kg orally          | Elective surgeries of less than one hour duration |
| Elective gynaecological or orthopaedic surgery                                                         | Midazolam 0.05–0.1 mg/kg orally | No                          | Controlled  | Manometer       | Gasteiger [18] 2010   | 19–70y      | i-gel LMA-ProSeal | Audible leak    | Controlled          | No                        | No                                 | Elective surgery                                  |
| Elective laparoscopic cholecystectomy                                                                  | Ranitidine 50 mg IV             | Vecuronium 0.08–0.1mg/kg IV | Controlled  | Audible leak    | Sharma [19] 2010      | adult       | i-gel LMA-ProSeal | Manometer       | Controlled          | Rocuronium 0.25 mg orally | Alprazolam 0.25 mg orally          | Elective surgery                                  |
| Lower-extremity orthopaedic surgery                                                                    | No                              | Rocuronium 0.6 mg/kg IV     | Controlled  | Manometer       | Shin [20] 2010        | adult       | i-gel LMA-ProSeal | Audible leak    | Controlled          | No                        | Midazolam 0.5mg/kg orally          | Elective surgery                                  |
| Lower abdominal, inguinal and orthopedic surger                                                        | Midazolam 0.3mg/kg orally       | No                          | Spontaneous | Manometer       | Das [9] 2012          | 1–6y        | i-gel LMA-ProSeal | Not reported    | Controlled          | Atracurium 0.5 mg/kg IV   | Diazepam 5mg orally                | Elective surgery                                  |
| Short stay elective surgery                                                                            | Midazolam 0.5 mg/kg orally      | No                          | Controlled  | Manometer       | Gasteiger [32] 2012   | 1.5–6y      | i-gel             | Audible leak    | Spontaneous         | No                        | No                                 | Elective short surgical procedures                |
| Elective surgeries < 1hour                                                                             | Midazolam 0.5 mg/kg orally      | No                          | Spontaneous | Manometer       | Goyal [10] 2012       | 2–5y        | i-gel LMA-ProSeal | Audible leak    | Controlled          | Atracurium 0.5 mg/kg IV   | Midazolam 0.5mg/kg orally          | Elective short duration pediatric surgery         |
| Laparoscopic gynecologic operation                                                                     | No                              | Rocuronium 0.6 mg/kg IV     | Controlled  | Manometer       | Jeon [13] 2012        | 18–65y      | i-gel LMA-ProSeal | Audible leak    | Controlled          | Vecuronium 0.1 mg/kg IV   | Midazolam 0.05 mg/kg intramuscular | Elective surgery                                  |
|                                                                                                        |                                 |                             |             |                 | Mitra [11] 2012       | 5–10y       | i-gel LMA-ProSeal | Manometer       | Spontaneous         | No                        | Midazolam 0.02 mg/kg IV            | Short surgical procedures                         |
|                                                                                                        |                                 |                             |             |                 | Van Zundert [37] 2012 | 18–80y      | i-gel LMA-ProSeal | Manometer       | Ventilated manually | No                        | Rectal 30 mg/kg paracetamol        | Elective surgery                                  |
|                                                                                                        |                                 |                             |             |                 | Chauhan [21] 2013     | 18–65y      | i-gel LMA-ProSeal | Audible leak    | Controlled          | No                        | Midazolam 7.5 mg orally            | Elective procedures                               |
|                                                                                                        |                                 |                             |             |                 | Fukuhara [31] 2013    | 3months–15y | i-gel LMA-ProSeal | Manometer       | Controlled          | Atracurium 0.5 mg/kg I.V  | Midazolam 2 mg IV                  | Elective surgeries                                |
|                                                                                                        |                                 |                             |             |                 | Das [39] 2014         | 20–30y      | i-gel LMA-ProSeal | Audible leak    | Controlled          | Atracurium 0.5 mg/kg I.V  | Midazolam 2 mg IV                  | Elective gynecological laparoscopic surgery       |
|                                                                                                        |                                 |                             |             |                 | Kini [36] 2014        | 18–60y      | i-gel LMA-ProSeal | Manometer       | Controlled          | Rocuronium 0.6 mg/kg I.V  | Midazolam 0.03 mg/kg IV            | Elective gynecological laparoscopic surgery       |

(Continued)

|                                              |                            |                              |             |              |                        |                      |                      |    |
|----------------------------------------------|----------------------------|------------------------------|-------------|--------------|------------------------|----------------------|----------------------|----|
| Extra-ocular ophthalmic surgery              | Midazolam 0.3 mg/kg orally | No                           | Controlled  | Audible leak | Saran [33]<br>2014     | 1-12y                | i-gel<br>LMA-ProSeal | 30 |
| Elective surgeries                           | Alprazolam 0.25 mg orally  | Vecuronium                   | Controlled  | Manometer    | Ekinci [40]<br>2015    | 18-65y               | i-gel<br>LMA-ProSeal | 40 |
| Elective surgeries                           | Midazolam 0.3 mg/kg oral   | Atracurium 0.5 mg/<br>kg IV  | Controlled  | Audible leak | Jadhav [22]<br>2015    | 18-60y               | i-gel<br>LMA-ProSeal | 30 |
| Elective superficial or peripheral surgery   | No                         | No                           | Spontaneous | Audible leak | Kayhan [15]<br>2015    | infants and neonates | i-gel<br>LMA-ProSeal | 25 |
| Elective short surgical procedures           | Midazolam 0.05 mg/kg IV    | Vecuronium 0.1 mg/<br>kg IV  | Controlled  | Audible leak | Henlin [24]<br>2015    | >18y                 | i-gel<br>LMA-ProSeal | 99 |
| Elective surgeries                           | No                         | Atracurium 0.5 mg/<br>kg IV  | Controlled  | Audible leak | Mishra [26]<br>2015    | 18-65y               | i-gel<br>LMA-ProSeal | 30 |
| Elective surgical procedures                 | Alprazolam 0.25 mg oral    | Rocuronium 0.6 mg/<br>kg IV  | Controlled  | Manometer    | Mishra SK [23]<br>2015 | Adult                | i-gel<br>LMA-ProSeal | 30 |
| Elective short surgical procedures           | No                         | No                           | Controlled  | Audible leak | Mukadder [25]<br>2015  | 18-60y               | i-gel<br>LMA-ProSeal | 35 |
| Minor (<1 hour in duration) elective surgery | No                         | No                           | Controlled  | Audible leak | Peker [34]<br>2015     | 1-10y                | i-gel<br>LMA-ProSeal | 15 |
| Elective surgery                             | Alprazolam 0.25 mg oral    | Vecuronium 0.02 mg/<br>kg IV | Controlled  | Not reported | Taxak [27]<br>2015     | 16-60y               | i-gel<br>LMA-ProSeal | 20 |
| Elective short duration surgeries            | Phenergan 0.5 mg/kg orally | Atracurium 0.5 mg/<br>kg IV  | Controlled  | Manometer    | Nirupa [12]<br>2016    | 2-6y                 | i-gel<br>LMA-ProSeal | 50 |
|                                              |                            |                              |             |              | Liew [14]<br>2016      | 21-80y               | i-gel<br>LMA-ProSeal | 50 |
|                                              |                            |                              |             |              | Das [28]<br>2017       | 20-60y               | i-gel<br>LMA-ProSeal | 50 |
|                                              |                            |                              |             |              | Banerjee [35]<br>2018  | 3-8y                 | i-gel<br>LMA-ProSeal | 35 |
|                                              |                            |                              |             |              | Singh [29]<br>2018     | 18-60y               | i-gel<br>LMA-ProSeal | 28 |
|                                              |                            |                              |             |              | Luthra [30]<br>2019    | 18-65y               | i-gel<br>LMA-ProSeal | 20 |
|                                              |                            |                              |             |              | Oba [16]<br>2020       | <12 months           | i-gel<br>LMA-ProSeal | 60 |
|                                              |                            |                              |             |              | Kalra [41]<br>2021     | 18-60y               | i-gel<br>LMA-ProSeal | 50 |
|                                              |                            |                              |             |              | Shiveshi [3]<br>2021   | 2-10y                | i-gel<br>LMA-ProSeal | 35 |

y = years, LMA = Laryngeal Mask Airway, NMB = Neuromuscular blocker, OLP = Oropharyngeal leak pressure

<https://doi.org/10.1371/journal.pone.0278871.t001>

Table 2. Risk of bias assessment for evaluation the quality of each included trials.

| Study (author, year) | Random sequence generation | Allocation concealment | Blinding of participant and personnel | Blinding of outcome assessment | Incomplete outcome data | Selective reporting | Other bias |
|----------------------|----------------------------|------------------------|---------------------------------------|--------------------------------|-------------------------|---------------------|------------|
| Singh 2009           | Unclear                    | Unclear                | Low                                   | Low                            | Low                     | Low                 | Unclear    |
| Gasteiger 2010       | Low                        | Low                    | Low                                   | Low                            | Low                     | Low                 | Low        |
| Sharma 2010          | Low                        | Low                    | Low                                   | Low                            | Low                     | Low                 | Low        |
| Shin 2010            | Low                        | Low                    | Low                                   | Low                            | Low                     | Low                 | Low        |
| Das 2012             | Low                        | Low                    | Low                                   | Unclear                        | Low                     | Low                 | Low        |
| Gasteiger 2012       | Low                        | Low                    | Low                                   | Low                            | Low                     | Low                 | Low        |
| Goyal 2012           | Low                        | Low                    | Unclear                               | Unclear                        | Low                     | Low                 | Unclear    |
| Mitra 2012           | Low                        | Low                    | Unclear                               | Unclear                        | Low                     | Low                 | Unclear    |
| Van 2012             | Low                        | Low                    | Unclear                               | Unclear                        | Low                     | Low                 | Unclear    |
| Chauhan 2013         | Low                        | Low                    | Unclear                               | Unclear                        | Low                     | Low                 | Low        |
| Fukuhara 2013        | Low                        | Low                    | Unclear                               | Low                            | Low                     | Low                 | Low        |
| Das 2014             | Low                        | Low                    | Low                                   | Low                            | Low                     | Low                 | Low        |
| Kini 2014            | Low                        | Low                    | Low                                   | Low                            | Low                     | Low                 | Low        |
| Saran 2014           | Low                        | Low                    | Low                                   | Unclear                        | Low                     | Low                 | Low        |
| Ekinci 2015          | Low                        | Low                    | Unclear                               | Unclear                        | Low                     | Low                 | Low        |
| Jadhav 2015          | Low                        | Low                    | Low                                   | Low                            | Low                     | Low                 | Low        |
| Kayhan 2015          | Low                        | Low                    | Low                                   | Low                            | Low                     | Low                 | Low        |
| Henlin 2015          | Low                        | Low                    | Low                                   | High                           | Low                     | Low                 | Low        |
| Mishra 2015          | Low                        | Low                    | Unclear                               | Unclear                        | Low                     | Low                 | Low        |
| Mishra SK 2015       | Low                        | Low                    | Unclear                               | Unclear                        | Low                     | Low                 | Low        |
| Mukadder 2015        | Low                        | Low                    | Unclear                               | Unclear                        | Low                     | Low                 | Low        |
| Peker 2015           | Low                        | Low                    | Low                                   | High                           | Low                     | Low                 | Low        |
| Taxak 2015           | Low                        | Low                    | Unclear                               | Unclear                        | Low                     | Low                 | Low        |
| Nirupa 2016          | Low                        | Low                    | Low                                   | Low                            | Low                     | Low                 | Low        |
| Liew 2016            | Low                        | Low                    | Unclear                               | Unclear                        | Low                     | Low                 | Low        |
| Das 2017             | Low                        | Low                    | Low                                   | Low                            | Low                     | Low                 | Low        |
| Banerjee 2018        | Low                        | Low                    | Unclear                               | Unclear                        | Low                     | Low                 | Low        |
| Singh 2018           | Low                        | Low                    | Low                                   | Low                            | Low                     | Low                 | Low        |
| Luthra 2019          | Low                        | Low                    | Unclear                               | Unclear                        | Low                     | Low                 | Low        |
| Obs 2020             | Low                        | Low                    | Unclear                               | Unclear                        | Low                     | Low                 | Low        |
| Shiveshi 2021        | Low                        | Low                    | Low                                   | Unclear                        | Low                     | Low                 | Low        |

<https://doi.org/10.1371/journal.pone.0278871.t002>

determined with subgroup analysis (Table 3). According to age subgroup exploration, the pooled outcomes displayed that i-gel™ offered a slightly greater OLP in the children subgroup, although an inadequate statistical difference was observed [MD = 1.34 (-0.37, 3.04),  $I^2 = 95\%$ ,  $P = 0.12$ ]; a lower OLP was recorded in the adult subgroup [MD = -3.48 (-5.62, -1.33),

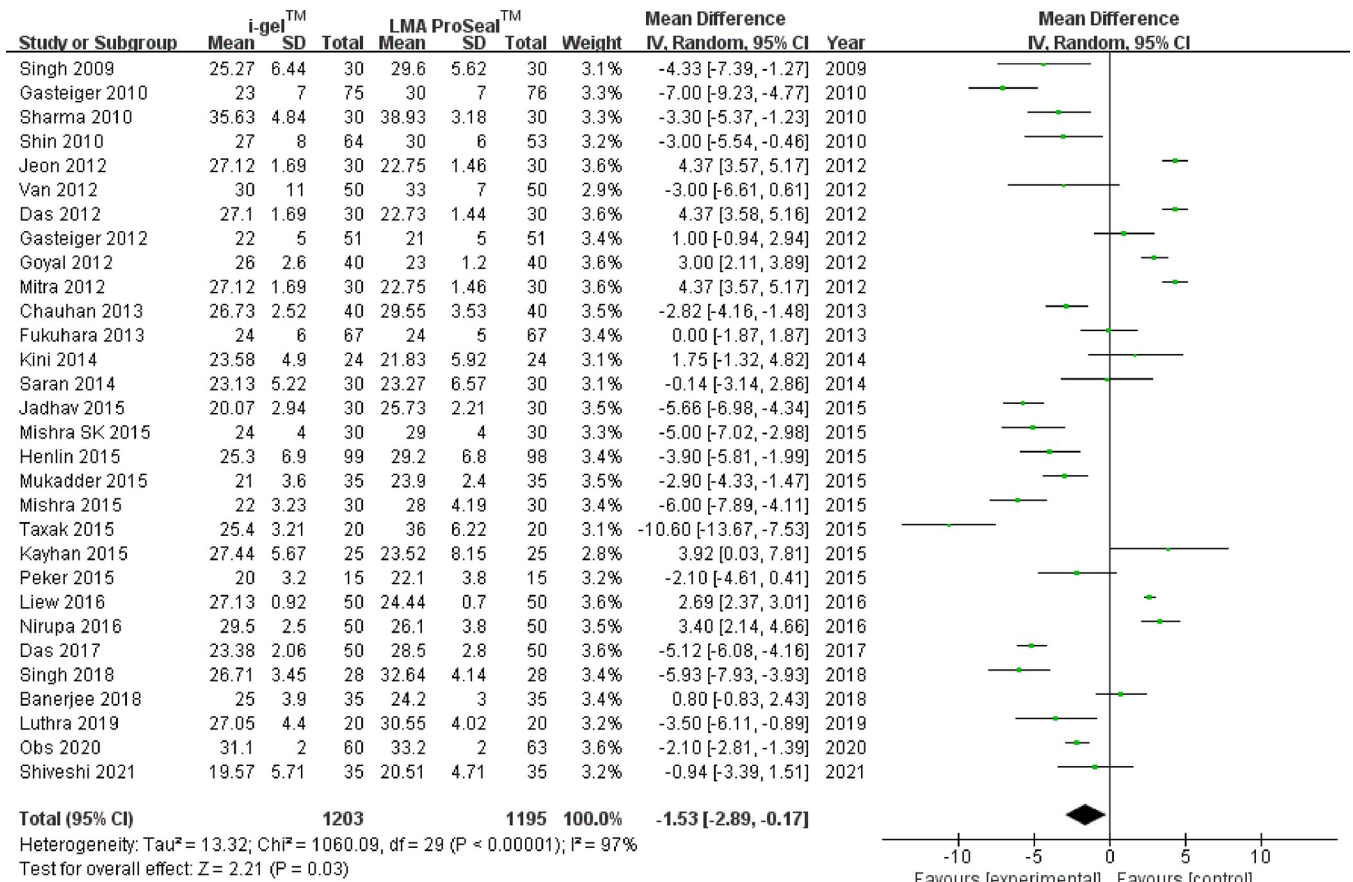

**Fig 2. Forest plot for comparison of i-gel™ and LMA ProSeal™ for OLP (cmH<sub>2</sub>O).** CI, confidence interval; I<sup>2</sup>, I-square heterogeneity statistic; IV, inverse variance.

<https://doi.org/10.1371/journal.pone.0278871.g002>

**Table 3. Subgroup meta-analysis for oropharyngeal leak pressure with i-gel™ and LMA ProSeal™.**

|                        | Subgroup     | References                                      | P-value | MD    | 95% CI        | I-square; P-value |
|------------------------|--------------|-------------------------------------------------|---------|-------|---------------|-------------------|
| age                    | <18 years    | [3, 9–12, 15, 16, 31–35]                        | 0.12    | 1.34  | (-0.37,3.04)  | 95%;<0.00001      |
|                        | ≥ 18 years   | [13, 14, 17–30, 36, 37]                         | 0.001   | -3.48 | (-5.62,-1.33) | 98%;<0.00001      |
| NMB                    | No           | [9–12, 15, 16, 18, 22, 24, 30–32, 34, 36–37]    | 0.74    | -0.34 | (-2.31,1.64)  | 97%;<0.00001      |
|                        | Yes          | [3, 13, 14, 17, 19–21, 23, 25–29, 33, 35]       | 0.01    | -2.74 | (-4.92,-0.57) | 98%;<0.00001      |
| Laparoscopic surgery   | No           | [3, 9–12, 14–18, 20–22, 24, 26–37]              | 0.06    | -1.42 | (-2.91,0.08)  | 97%;<0.00001      |
|                        | Yes          | [13, 19, 23, 25]                                | 0.52    | -1.66 | (-6.74,3.42)  | 98%;<0.00001      |
| OLP measurement method | Audible leak | [12, 14, 16, 17, 19, 23, 24, 28, 30, 31, 33–37] | 0.11    | -1.55 | (-3.45,0.34)  | 97%;<0.00001      |
|                        | Manometer    | [3, 9–11, 13, 15, 18, 20–22, 25–27, 29, 32]     | 0.18    | -1.53 | (-3.8,0.73)   | 98%;<0.00001      |

OLP, oropharyngeal leak pressure; LMA, Laryngeal Mask Airway; NMB, Neuromuscular blocker; MD, mean difference; CI, confidence interval.

<https://doi.org/10.1371/journal.pone.0278871.t003>



$I^2 = 98\%$ ,  $P = 0.001$ ] compared with LMA ProSeal™. Considering the potential use of NMB during anesthesia, the pooled results indicated that 15 trials [3, 13, 14, 17, 19–21, 23, 25–29, 33, 35] that applied NMB were covered, and the integrated outcome was lower for i-gel™ than for LMA ProSeal™ [MD = -2.74 (-4.92, -0.57),  $I^2 = 98\%$ ,  $P = 0.001$ ]. Without NMB, the integrated outcome showed no considerable variation between the two groups [MD = -0.34 (-2.31, 1.64),  $I^2 = 97\%$ ,  $P = 0.74$ ]. In case of the pooled analysis of the surgery type, no great difference was found between the two groups with neither laparoscopic nor non-laparoscopic surgery [MD = -1.66 (-6.74, 3.42),  $I^2 = 98\%$ , and  $P = 0.52$ ; MD = -1.42 (-2.91, 0.08),  $I^2 = 97\%$ ,  $P = 0.06$ , respectively]. Considering the different measurements of OLP (audible leak and manometric stability), the subgroup analysis showed no great difference between the two groups [MD = -1.55 (-3.45, 0.34),  $I^2 = 97\%$ ,  $P = 0.11$ ; MD = -1.53 (-3.8, 0.73),  $I^2 = 98\%$ ,  $P = 0.18$ , respectively]. The funnel plot of OLP did not indicate obvious substantial asymmetry (Fig 3).

## 2. First-insertion success rate, insertion ease of SADs, the time spent on intubation, and gastric-tube first-insertion success rate

A total of 26 trials [3, 9–15, 17–20, 22–25, 27–28, 30–36, 40] showed that i-gel™ provided a higher rate of first-insertion success [RR = 1.03 (1.0, 1.06),  $I^2 = 32\%$ ,  $P = 0.03$ ] than LMA ProSeal™ (Fig 4). Exactly 21 trials [3, 9–12, 16, 17, 19, 21–23, 25, 28–31, 33, 34, 39–41] indicated that the insertion ease was substantially higher for i-gel™ than for LMA ProSeal™ [RR = 1.06 (1.01, 1.11),  $I^2 = 47\%$ ,  $P = 0.01$ ] (Fig 4). In addition, 23 trials [3, 12–16, 19, 21–25, 27–29, 31–34, 36, 37, 40] showed that SAD intubation time was notably shorter for i-gel™ than for LMA ProSeal™ [MD = -5.61 (-7.71, -3.51),  $I^2 = 98\%$ , and  $P < 0.00001$ ] (Fig 5). Twelve trials [3, 11, 14, 17, 19, 21, 23, 25, 27, 32, 33, 40] examined the rate of gastric-tube first-insertion success and observed no great difference between the two SADs [RR = 1.04 (0.99, 1.18),  $I^2 = 66\%$ , and  $P = 0.11$ ] (Fig 5). With the removal of studies one by one, the heterogeneity of intubation time and the rate of gastric-tube first interpolation success revealed no marked decrease. The funnel plot of first- insertion success rate (Fig 3), insertion ease of SADs, and intubation time (Fig 6) did not indicate obvious substantial asymmetry.

## 3. Adverse events

The incidence of revealed adverse events were evaluated: blood staining on the SADs, sore throat, cough, and laryngospasm was shown in 15 [3, 9–11, 14–17, 19–21, 28, 29, 32, 39], 10 [3, 14, 19–22, 29, 30, 39, 40], 5 [3, 10, 16, 22, 39], 3 studies [15, 16, 22], respectively. Blood staining on the SADs after surgery (Fig 5) and sore throat (Fig 7) were greatly more universally occurring with LMA ProSeal™ than with i-gel™ [RR = 0.44 (0.28, 0.69),  $I^2 = 25\%$ ,  $P = 0.0003$ ; RR = 0.31 (0.18, 0.52),  $I^2 = 0\%$ ,  $P < 0.0001$ , respectively]. The two groups showed similar incidence of coughs and laryngospasm [RR = 1.17 (0.39, 3.46),  $I^2 = 0\%$ ,  $P = 0.78$ ; RR = 0.83 (0.15, 4.52),  $I^2 = 0\%$ ,  $P = 0.83$ , respectively] (Fig 7). The funnel plot of blood staining did not show evident substantial asymmetry (Fig 8). The included studies reported none of the severe complications.

## Discussion

The major finding of the current meta-analysis is that i-gel™ provided a greatly lower OLP, incidence of blood staining on the SADs, sore throat, and a shorter intubation time than LMA ProSeal™ among patients during general anesthesia. In addition, i-gel™ offered a significantly higher first-insertion success rate and ease of insertion than LMA ProSeal™. No great differences were found in gastric-tube placement first-insertion rate, laryngospasm, and cough between i-gel™ and LMA ProSeal™.

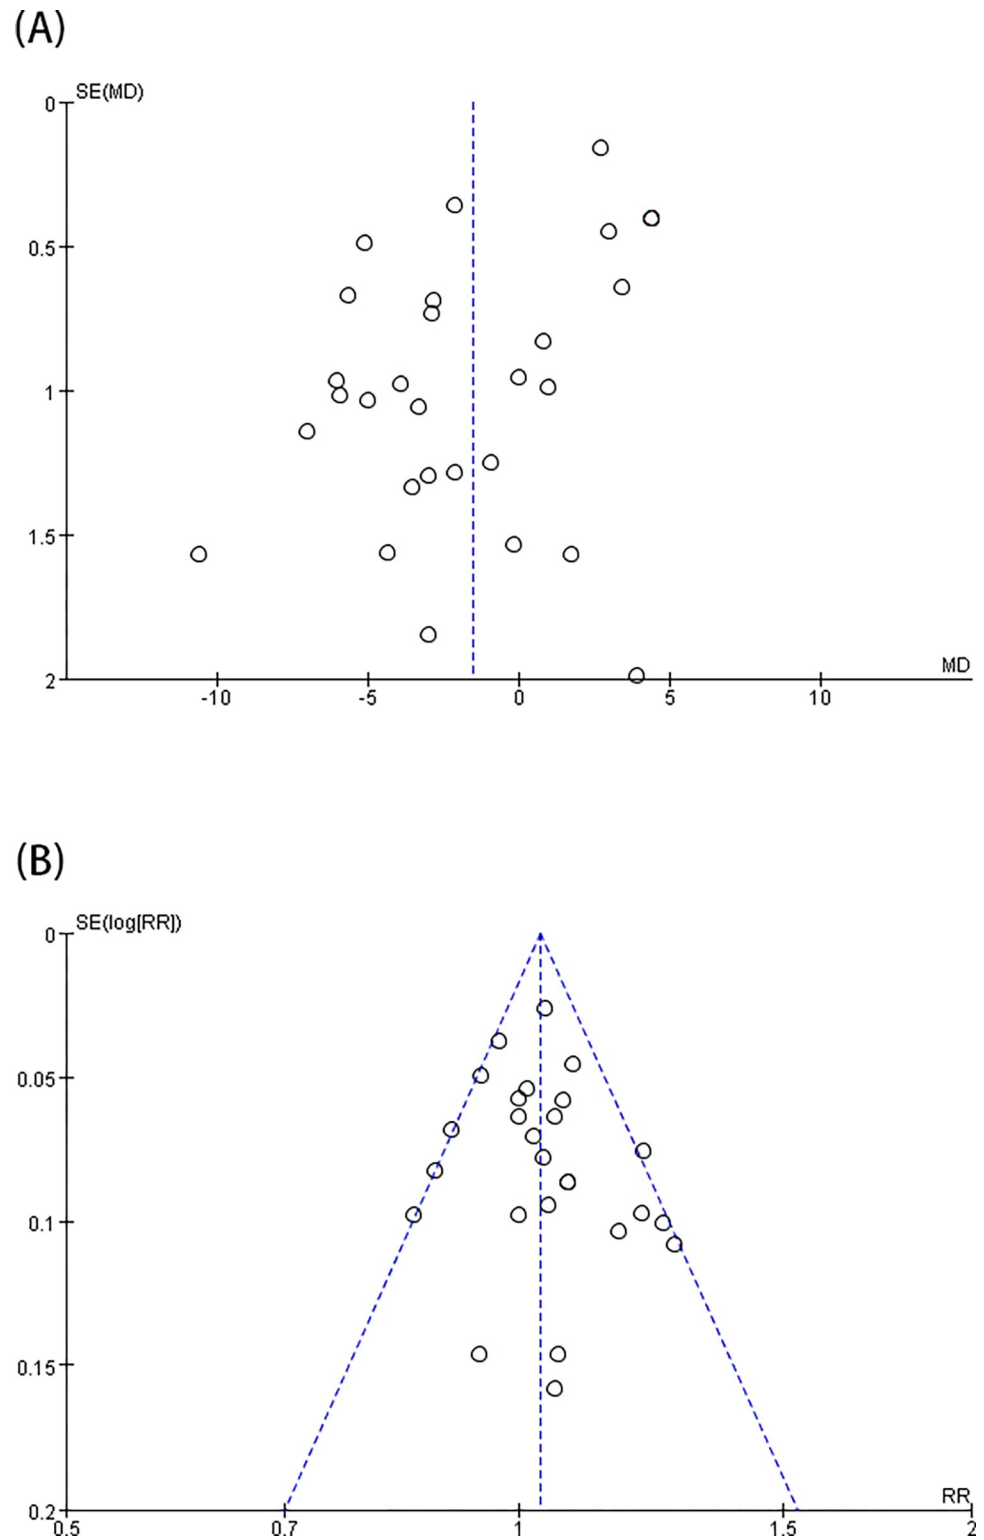

**Fig 3.** Funnel plots for comparison of i-gel™ and LMA ProSeal™ for OLP (A) and insertion success rate at the first attempt (B).

<https://doi.org/10.1371/journal.pone.0278871.g003>

(A)

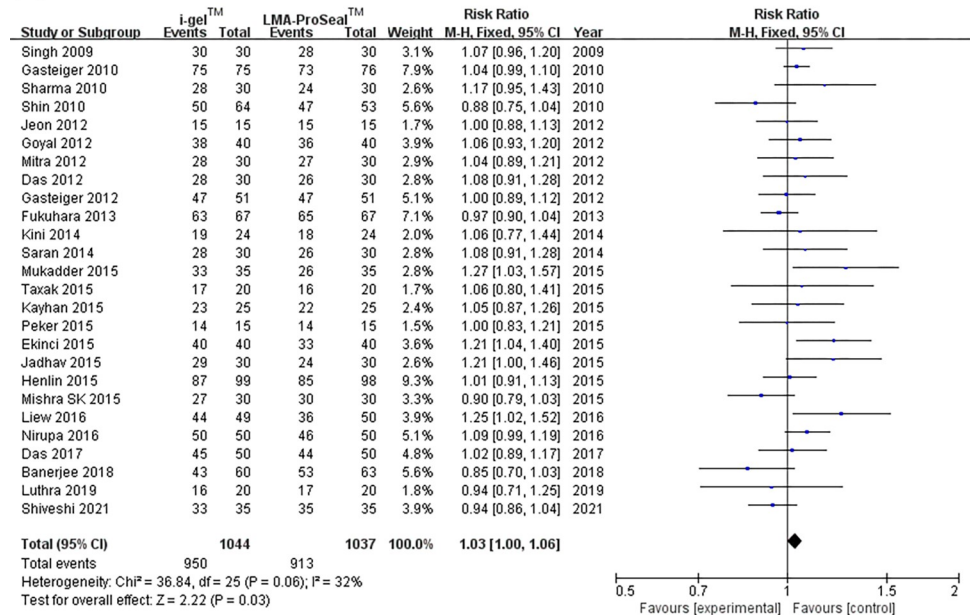

(B)

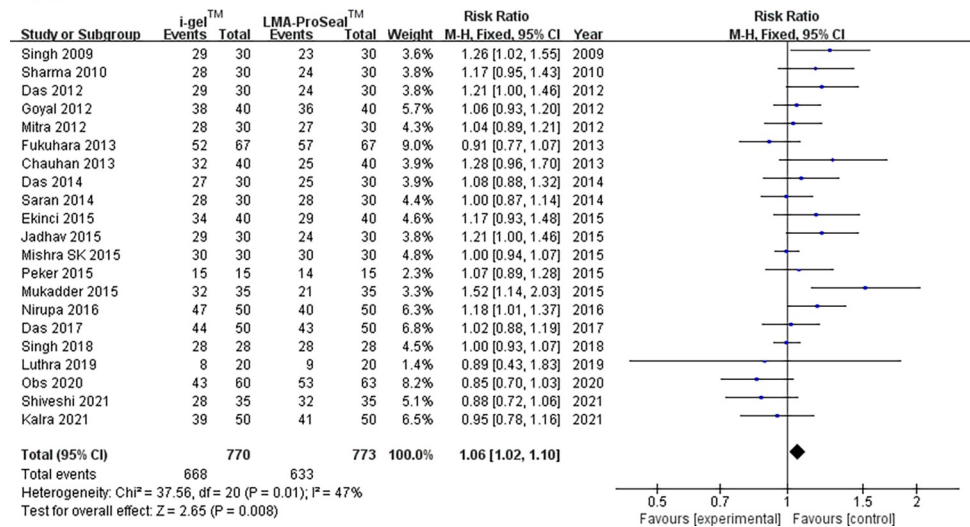

**Fig 4.** Forest plot for comparison of i-gel™ and LMA ProSeal™ for insertion success rate at the first attempt (A); and ease of insertion (B). CI, confidence interval; I<sup>2</sup>, I-square heterogeneity statistic; IV, inverse variance.

<https://doi.org/10.1371/journal.pone.0278871.g004>

OLP refers to the airway leak or pressure airway sealing, and it is the most significant index for evaluating the security and effectiveness of airway tools [42]. Between the cuff of the mask and soft tissue around the neck was decided the power of the seal [7, 43], the OLP determines the feasibility of the extent of protecting airway and security of positive pressure ventilation. The current meta-analysis observed a greatly higher OLP with LMA ProSeal™ than with i-gel™. The higher OLP in the LMA ProSeal™ group caused by the inflatable cuff with a ventral and dorsal cuff could have led to better seal than i-gel™ with a noninflatable cuff [30]. Growing

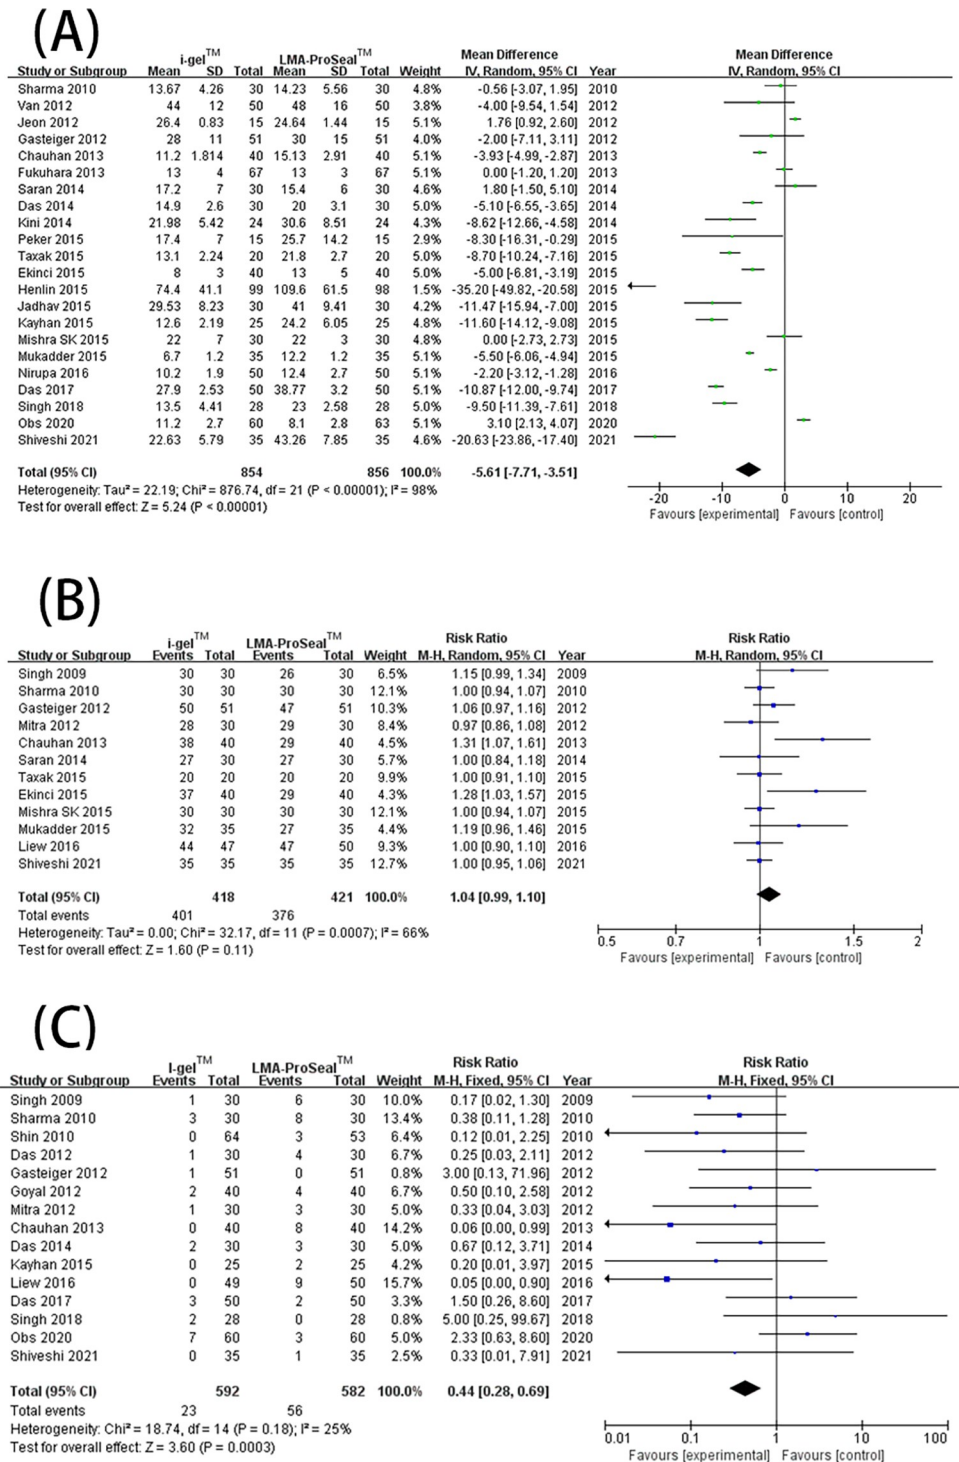

**Fig 5.** Forest plot for comparison of i-gel™ and LMA ProSeal™ for insertion time (A); gastric tube placement first insertion success rate (B); blood staining on the SADs (C). CI, confidence interval; I<sup>2</sup>, I-square heterogeneity statistic; IV, inverse variance.

<https://doi.org/10.1371/journal.pone.0278871.g005>

OLP provides specific merits in fat patients, restrictive and obstructive lung diseases, lithotomy position, and pneumo-peritoneum patients [44].

(A)

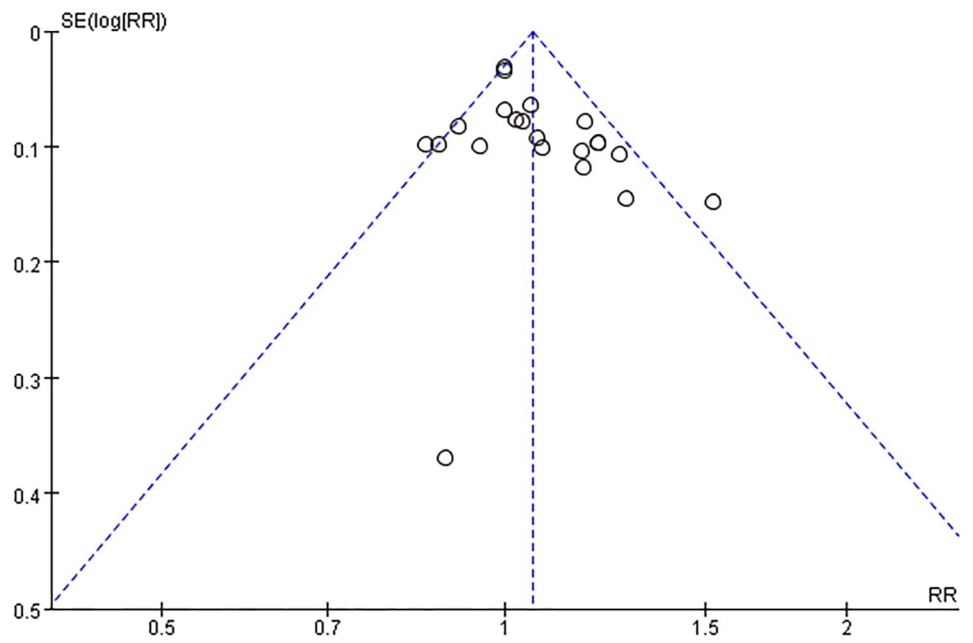

(B)

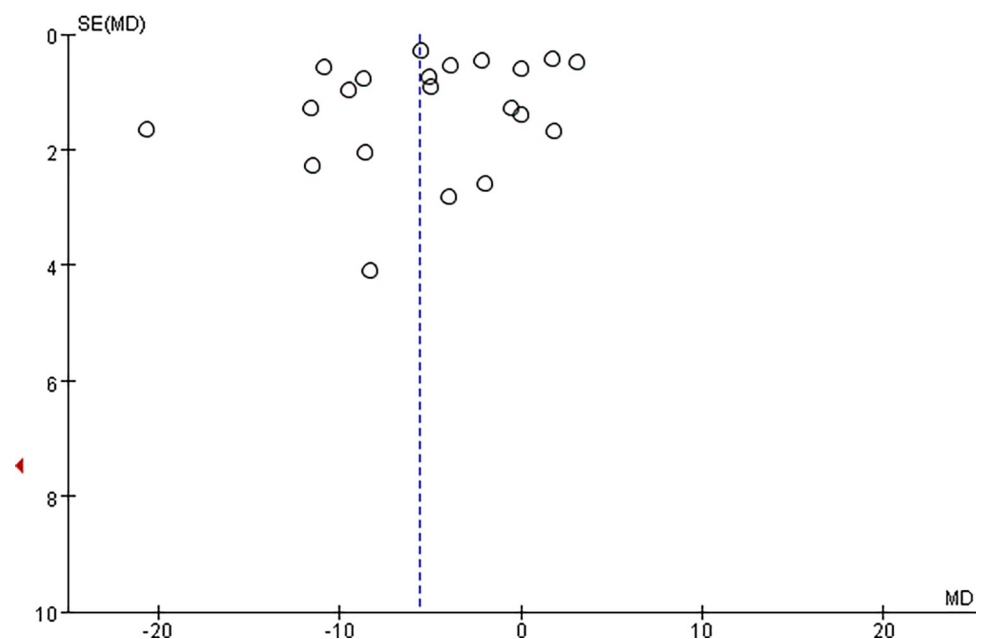

**Fig 6.** Funnel plots for comparison of i-gel™ and LMA ProSeal™ for ease of insertion (A); insertion time (B).

<https://doi.org/10.1371/journal.pone.0278871.g006>

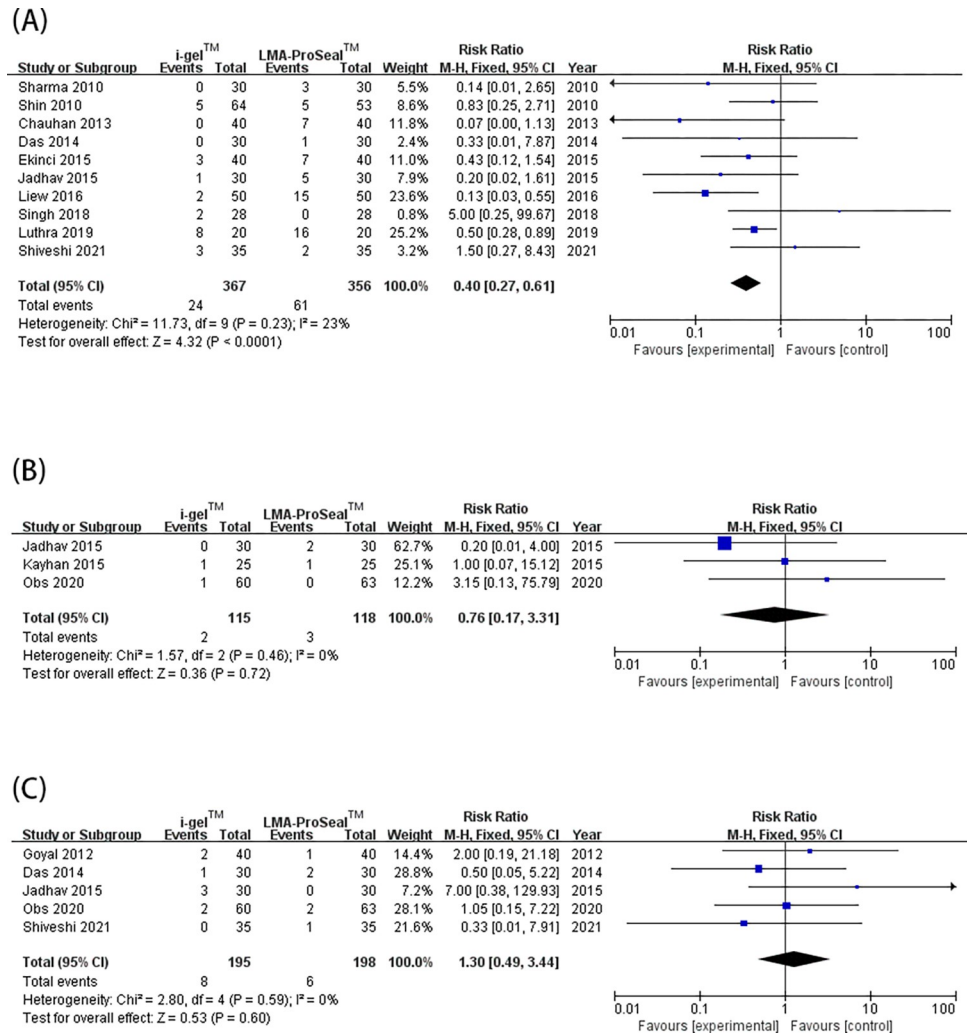

**Fig 7.** Forest plot for comparison of i-gel™ and LMA ProSeal™ for sore throat (A); laryngospasm (B); cough (C). CI, confidence interval; I<sup>2</sup>, I-square heterogeneity statistic; IV, inverse variance.

<https://doi.org/10.1371/journal.pone.0278871.g007>

Patient age, the use of NMB, intra-abdominal pressure during operation, evaluation approach of OLP, and LMA size selection standards may influence OLP [45]. Distinct data heterogeneity in the united OLP outcome was observed in our findings. A great heterogeneity (I<sup>2</sup> = 97%) cannot be reduced although different subgroup analyses were adopted, probably due to the application of various sizes of SADs in these trials. The research by Mitra [11] used a 2.5 device. In Shiveshi's research [3], despite the use of 2 and 2.5 devices, the device adopted showed the evident size of 2 in more than 70% of kids. In addition, diversities in induction, maintenance, anesthesia depth, measurement standards, and the number of patients researched might also have contributed to the distinct data heterogeneity.

SADs with an inflatable mask show promise in causing tissue distortion, venous compression, and nerve injury, which translate into the growing incidence of related postoperative morbidity [5]. The incrimination of trauma on insertion, various insertions, and pressure brought by cuff against the pharyngeal mucosa cuff volumes and pressure has been made for postoperative complications [46, 47]. In the present study, i-gel™ provided a higher first-insertion success rate, higher ease of insertion, and shorter intubation time than LMA ProSeal™,

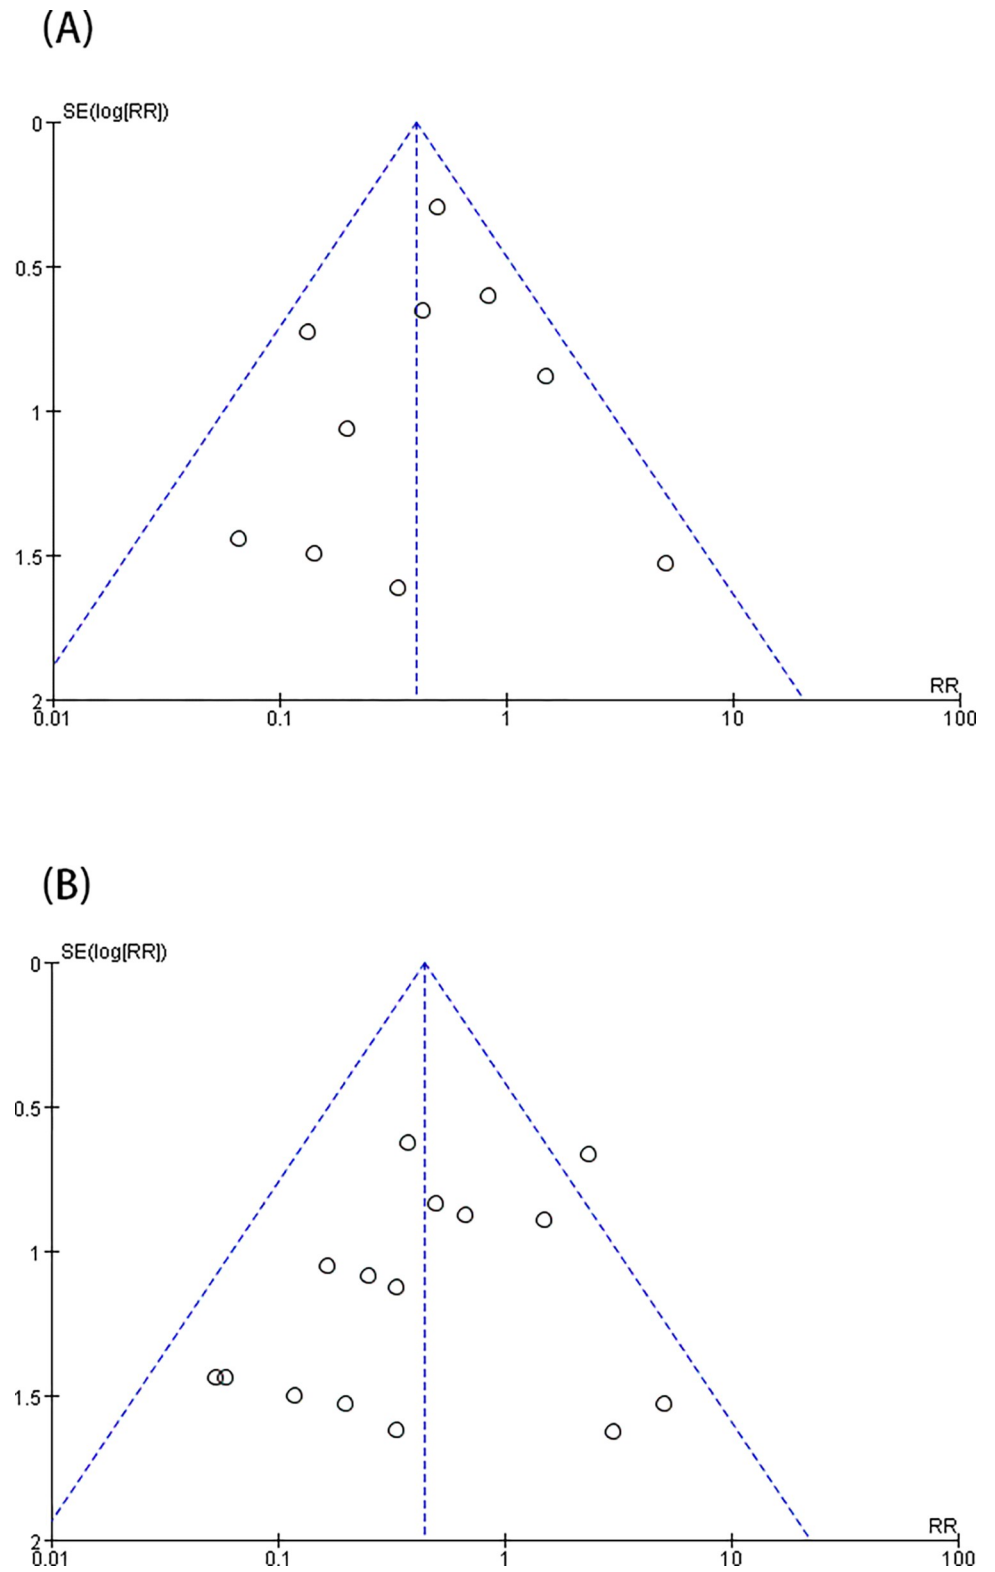

**Fig 8.** Funnel plots for comparison of i-gel™ and LMA ProSeal™ for sore throat (A); and blood staining (B).

<https://doi.org/10.1371/journal.pone.0278871.g008>

possibly because of a convenient disposable device, relieve of interpolation by stiff bite block, and the natural oropharyngeal curvature of i-gel™ compared with LMA ProSeal™. In addition, we observed that the application of the i-gel™ is related to a lower incidence of pharyngolaryngeal morbidity (blood staining of the SADs and sore throat) compared with the LMA ProSeal™.

By comparing with a previous review [48], our study presented different findings. First, the included studies in the previous review were published from 2009 to 2014, which is a long time ago. However, nearly 50% of the studies [3, 12, 14–16, 22–30, 34, 35, 40, 41] in our present meta-analysis were published after 2014 and reported conflicting results. Second, this work added several new outcomes compared with the past reviews. The first research showed that i-gel™ can offer a higher first-insertion success rate and insertion ease, similar gastric-tube-placement first-insertion rate, laryngospasm, and cough by comparing with LMA ProSeal™ in adults. Third, previous meta-analyses [49] comparing the two devices reported higher a OLP in i-gel™ than LMA ProSeal™ for pediatric patients, forming a contrast against our findings, which indicated that i-gel™ offers a similar OLP compared with LMA ProSeal™ in children. This disparity may be due to the differences in the included studies. Finally, LMA ProSeal™ did not show a higher OLP compared with i-gel™ under conditions of NMB and laparoscopic surgery.

Several limitations were observed in the current work. First, diversities in induction, maintenance, anesthesia depth, and the number of patients researched might have contributed to the distinct data heterogeneity. In spite of subgroups and sensitivity explorations were performed to control several factors, all possible confounding factors cannot be accounted for. Second, while comprehensively searching the published articles, the bias of potential publication might have been present because of the unsuccessful to include in-progress or unpublished studies. Third, the mean difference of OLP from the pooled estimates is 1.53, with the absolute value of OLP from the included studies were all more than 20cmH<sub>2</sub>O. An OLP value of more than 20cmH<sub>2</sub>O is generally accepted as an adequate seal. In clinical practice, the difference in OLP values may not be meaningful, when both devices could achieve a enough seal to provide adequate ventilation. In the end, poor quality was found in several included studies. Two studies [24, 34] conducted a single-blinded rather than a double-blinded trial, and several research did not illustrate the details of binding in the result evaluation. Hence, extra high-quality research and follow-up studies such as trial sequential analysis are necessary to certify our outcomes.

To conclude, our outcomes showed that both i-gel™ and LMA ProSeal™ may offer a good seal to provide adequate ventilation. In addition, i-gel™ offers certain advantages over LMA ProSeal™ (higher insertion success rate at the first attempt, insertion ease, and rapid intubation time) with limited adverse events (blood staining, and sore throat) in anesthetized patients.

## Author Contributions

**Data curation:** Yuan Tan.

**Formal analysis:** Yuan Tan.

**Methodology:** Yuan Tan.

**Supervision:** Rurong Wang.

**Writing – original draft:** Jingyao Jiang.

**Writing – review & editing:** Yuan Tan, Rurong Wang.



## References

1. Ramesh S, Jayanthi R, Archana SR. Paediatric airway management: What is new? *Indian J Anaesth.* 2012 Sep; 56(5):448–53. <https://doi.org/10.4103/0019-5049.103959> PMID: 23293383
2. Mushtaq R, Zahoor S A, Naqash I, et al. Cardiovascular responses to tracheal extubation in normotensive patients; A comparison with LMA removal. *JK Practitioner.* 2003; 10:22–4.
3. Shiveshi P, Anandaswamy TC. Comparison of Proseal LMA with i-gel in children under controlled ventilation: a prospective randomised clinical study. *Braz J Anesthesiol.* 2021 Apr 3;S0104–0014(21)00118–4. <https://doi.org/10.1016/j.bjane.2021.02.042> PMID: 33823205
4. Hendinezhad M A, Babaei A, Baradari A G, et al. Comparison of Supraglottic airway devices for airway management during surgery in children: A review of literature. 2019; 7:89–98.
5. Levitan RM, Kinkle WC. Initial anatomic investigations of the I-gel™ airway: a novel supraglottic airway without inflatable cuff. *Anaesthesia.* 2005 Oct; 60(10):1022–6. <https://doi.org/10.1111/j.1365-2044.2005.04258.x> PMID: 16179048
6. Brain AI, Verghese C, Strube PJ. The LMA 'ProSeal'—a laryngeal mask with an oesophageal vent. *Br J Anaesth.* 2000 May; 84(5):650–4. <https://doi.org/10.1093/bja/84.5.650> PMID: 10844848
7. Keller C, Brimacombe JR, Keller K, et al. Comparison of four methods for assessing airway sealing pressure with the laryngeal mask airway in adult patients.[J]. *Anesthesia&Analgesia*, 1998, 87(6):1379–82. <https://doi.org/10.1093/bja/82.2.286> PMID: 10365012
8. Lopez-Gil M, Brimacombe J, Keller C. A comparison of four methods for assessing oropharyngeal leak pressure with the laryngeal mask airway (LMA) in paediatric patients.[J]. *Pediatric Anesthesia*, 2001, 11(3):319–21. <https://doi.org/10.1046/j.1460-9592.2001.00649.x> PMID: 11359590
9. Das B, Mitra S, Jamil SN, et al. Comparison of three supraglottic devices in anesthetised paralyzed children undergoing elective surgery[J]. 6,3(2012-09-21), 2012, 6(3):224–228. <https://doi.org/10.4103/1658-354X.101212> PMID: 23162394
10. Goyal R, Shukla RN, Kumar G. Comparison of size 2 i-gel supraglottic airway with LMA-ProSeal and LMA-Classic in spontaneously breathing children undergoing elective surgery.[J]. *Pediatric Anesthesia*, 2012, 22(4):355–359. <https://doi.org/10.1111/j.1460-9592.2011.03757.x> PMID: 22151106
11. Mitra S, Das B, Jamil SN. Comparison of Size 2.5 i-gel™ with Proseal LMA™ in Anaesthetised, Paralyzed Children Undergoing Elective Surgery[J]. *North American Journal of Medical Sciences*, 2012, 4(10):453–7. <https://doi.org/10.4103/1947-2714.101983> PMID: 23112965
12. Nirupa R, Gombar S, Ahuja V, et al. A randomised trial to compare i-gel and ProSeal™ laryngeal mask airway for airway management in paediatric patients[J]. *Indian Journal of Anaesthesia*, 2016, 60(10):726–731. <https://doi.org/10.4103/0019-5049.191670> PMID: 27761035
13. Jeon W J, Cho S Y, Baek S J, et al. Comparison of the Proseal LMA and intersurgical I-gel during gynecological laparoscopy[J]. *Korean J Anesthesiol*, 2012, 63(6):510–514. <https://doi.org/10.4097/kjae.2012.63.6.510> PMID: 23277811
14. Liew G H, Yu E D, Shah S S, et al. Comparison of the clinical performance of i-gel™, LMA Supreme and LMA ProSeal™ in elective surgery[J]. *Singapore medical journal*, 2016, 57(8):432–437. <https://doi.org/10.11622/smedj.2016133> PMID: 27549212
15. Kayhan GE, Begec Z, Sanli M, et al. Performance of size 1 I-gel compared with size 1 ProSeal laryngeal mask in anesthetized infants and neonates. *Scientific World Journal.* 2015; 2015:426186. <https://doi.org/10.1155/2015/426186> PMID: 25793219
16. Oba S, Türk HŞ, Kılınç L, et al. Comparing I-gel to Proseal Laryngeal Mask Airways in Infants: A Prospective Randomised Clinical Study. *Turk J Anaesthesiol Reanim.* 2020 Aug; 48(4):308–313. <https://doi.org/10.5152/TJAR.2019.47936> PMID: 32864646
17. Singh I, Gupta M, Tandon M. Comparison of Clinical Performance of I-gel with LMA-Proseal in Elective Surgeries. *Indian J Anaesth.* 2009 Jun; 53(3):302–5. PMID: 20640137
18. Gasteiger L, Brimacombe J, Perkhofe D, Kaufmann M, Keller C. Comparison of guided insertion of the LMA ProSeal vs the i-gel. *Anaesthesia.* 2010 Sep; 65(9):913–6. <https://doi.org/10.1111/j.1365-2044.2010.06422.x> PMID: 20645948
19. Sharma B, Sehgal R, Sahai C, et al. PLMA vs. I-gel: A Comparative Evaluation of Respiratory Mechanics in Laparoscopic Cholecystectomy. *J Anaesthesiol Clin Pharmacol.* 2010 Oct; 26(4):451–7. PMID: 21547168
20. Shin WJ, Cheong YS, Yang HS, et al. The supraglottic airway I-gel in comparison with ProSeal laryngeal mask airway and classic laryngeal mask airway in anaesthetized patients. *Eur J Anaesthesiol.* 2010 Jul; 27(7):598–601. <https://doi.org/10.1097/EJA.0b013e3283340a81> PMID: 19915475

21. Chauhan G, Nayar P, Seth A, et al. Comparison of clinical performance of the I-gel with LMA ProSeal. *J Anaesthesiol Clin Pharmacol*. 2013 Jan; 29(1):56–60. <https://doi.org/10.4103/0970-9185.105798> PMID: 23493414
22. Jadhav PA, Dalvi NP, Tendolkar BA. I-gel versus laryngeal mask airway-Proseal: Comparison of two supraglottic airway devices in short surgical procedures. *J Anaesthesiol Clin Pharmacol*. 2015 Apr-Jun; 31(2):221–5. <https://doi.org/10.4103/0970-9185.155153> PMID: 25948905
23. Mishra SK, Sivaraman B, Balachander H, et al. Effect of pneumoperitoneum and Trendelenberg position on oropharyngeal sealing pressure of I-gel™™ and ProSeal LMA™™ in laparoscopic gynecological surgery: A randomized controlled trial. *Anesth Essays Res*. 2015 Sep-Dec; 9(3):353–8. <https://doi.org/10.4103/0259-1162.159771> PMID: 26712973
24. Henlin T, Sotak M, Kovaricek P, et al. Comparison of five 2nd-generation supraglottic airway devices for airway management performed by novice military operators. *Biomed Res Int*. 2015; 2015:201898. <https://doi.org/10.1155/2015/201898> PMID: 26495289
25. Mukadder S, Zekine B, Erdogan KG, et al. Comparison of the proseal, supreme, and i-gel SAD in gynecological laparoscopic surgeries. *Scientific World Journal*. 2015; 2015:634320. <https://doi.org/10.1155/2015/634320> PMID: 25802890
26. Mishra SK, Nawaz M, Satyapraksh MV, et al. Influence of Head and Neck Position on Oropharyngeal Leak Pressure and Cuff Position with the ProSeal Laryngeal Mask Airway and the I-gel: A Randomized Clinical Trial. *Anesthesiol Res Pract*. 2015; 2015:705869. <https://doi.org/10.1155/2015/705869> PMID: 25648620
27. Taxak S, Gopinath A, Saini S, et al. A prospective study to evaluate and compare laryngeal mask airway ProSeal and i-gel airway in the prone position. *Saudi J Anaesth*. 2015 Oct-Dec; 9(4):446–50. <https://doi.org/10.4103/1658-354X.159473> PMID: 26543466
28. Das B, Varshney R, Mitra S. A randomised controlled trial comparing ProSeal laryngeal mask airway, i-gel and Laryngeal Tube Suction-D under general anaesthesia for elective surgical patients requiring controlled ventilation. *Indian J Anaesth*. 2017 Dec; 61(12):972–977. [https://doi.org/10.4103/ija.IJA\\_339\\_17](https://doi.org/10.4103/ija.IJA_339_17) PMID: 29307902
29. Singh A, Bhalotra AR, Anand R. A comparative evaluation of ProSeal laryngeal mask airway, I-gel and Supreme laryngeal mask airway in adult patients undergoing elective surgery: A randomised trial. *Indian J Anaesth*. 2018 Nov; 62(11):858–864. [https://doi.org/10.4103/ija.IJA\\_153\\_18](https://doi.org/10.4103/ija.IJA_153_18) PMID: 30532321
30. Luthra A, Chauhan R, Jain A, et al. Comparison of Two Supraglottic Airway Devices: I-gel Airway and ProSeal Laryngeal Mask Airway Following Digital Insertion in Nonparalyzed Anesthetized Patients. *Anesth Essays Res*. 2019 Oct-Dec; 13(4):669–675. [https://doi.org/10.4103/aer.AER\\_132\\_19](https://doi.org/10.4103/aer.AER_132_19) PMID: 32009713
31. Fukuhara A, Okutani R, Oda Y. A randomized comparison of the i-gel™ and the ProSeal laryngeal mask airway in pediatric patients: performance and fiberoptic findings. *J Anesth*. 2013 Feb; 27(1):1–6. <https://doi.org/10.1007/s00540-012-1477-4> PMID: 22965330
32. Gasteiger L, Brimacombe J, Oswald E, et al. LMA ProSeal™ vs. i-gel™ in ventilated children: a randomised, crossover study using the size 2 mask. *Acta Anaesthesiol Scand*. 2012 Nov; 56(10):1321–4. <https://doi.org/10.1111/j.1399-6576.2012.02765.x> PMID: 22946775
33. Saran S, Mishra SK, Badhe AS, et al. Comparison of i-gel supraglottic airway and LMA-ProSeal™ in pediatric patients under controlled ventilation. *J Anaesthesiol Clin Pharmacol*. 2014 Apr; 30(2):195–8. <https://doi.org/10.4103/0970-9185.130013> PMID: 24803756
34. Peker G, Takmaz SA, Baltacı B, et al. Comparison of Four Different Supraglottic Airway Devices in Terms of Efficacy, Intra-ocular Pressure and Haemodynamic Parameters in Children Undergoing Ophthalmic Surgery. *Turk J Anaesthesiol Reanim*. 2015 Oct; 43(5):304–12. <https://doi.org/10.5152/TJAR.2015.49091> PMID: 27366519
35. Banerjee G, Jain D, Bala I, et al. Comparison of the ProSeal laryngeal mask airway with the I-gel™ in the different head-and-neck positions in anaesthetised paralysed children: A randomised controlled trial. *Indian J Anaesth*. 2018 Feb; 62(2):103–108. [https://doi.org/10.4103/ija.IJA\\_594\\_17](https://doi.org/10.4103/ija.IJA_594_17) PMID: 29491514
36. Kini G, Devanna GM, Mukkapati KR, et al. Comparison of I-gel with proseal LMA in adult patients undergoing elective surgical procedures under general anesthesia without paralysis: A prospective randomized study. *J Anaesthesiol Clin Pharmacol*. 2014 Apr; 30(2):183–7. <https://doi.org/10.4103/0970-9185.130008> PMID: 24803754
37. Van Zundert TC, Brimacombe JR. Similar oropharyngeal leak pressures during anaesthesia with i-gel, LMA-ProSeal and LMA-Supreme Laryngeal Masks. *Acta Anaesthesiol Belg*. 2012; 63(1):35–41. PMID: 22783708

38. Liberati A, Altman DG, Tetzlaff J, et al. The PRISMA statement for reporting systematic reviews and meta-analyses of studies that evaluate health care interventions: explanation and elaboration. *PLoS Med* 2009; 6:e1000100. <https://doi.org/10.1371/journal.pmed.1000100> PMID: 19621070
39. Das A, Majumdar S, Mukherjee A, et al. i-gel™ in Ambulatory Surgery: A Comparison with LMA-ProSeal™ in Paralyzed Anaesthetized Patients. *J Clin Diagn Res*. 2014 Mar; 8(3):80–4. <https://doi.org/10.7860/JCDR/2014/7890.4113> PMID: 24783088
40. Ekinçi O, Abitagaoglu S, Turan G, et al. The comparison of ProSeal and I-gel™ laryngeal mask airways in anesthetized adult patients under controlled ventilation. *Saudi Med J*. 2015 Apr; 36(4):432–6. <https://doi.org/10.15537/smj.2015.4.10050> PMID: 25828279
41. Kalra N, Gupta A, Sood R, et al. Comparison of Proseal Laryngeal Mask Airway with the I-gel™ Supraglottic Airway During the Bailey Manoeuvre in Adult Patients Undergoing Elective Surgery. *Turk J Anaesthesiol Reanim*. 2021 Apr; 49(2):107–113. <https://doi.org/10.5152/TJAR.2020.29569> PMID: 33997838
42. Beleña J M, Núñez M, Anta D, et al. Comparison of Laryngeal Mask Airway Supreme and Laryngeal Mask Airway ProSeal with respect to oropharyngeal leak pressure during laparoscopic cholecystectomy: a randomised controlled trial[J]. *European Journal of Anaesthesiology (EJA)*, 2013, 30(3): 119–123. <https://doi.org/10.1097/EJA.0b013e32835aba6a> PMID: 23318811
43. Seet E, Rajeev S, Firoz T, et al. Safety and efficacy of laryngeal mask airway Supreme versus laryngeal mask airway ProSeal: a randomized controlled trial[J]. *European Journal of Anaesthesiology (EJA)*, 2010, 27(7): 602–607. <https://doi.org/10.1097/eja.0b013e32833679e3> PMID: 20540172
44. LOPEZ-GIL M, Brimacombe J. The ProSeal laryngeal mask airway in children[J]. *Pediatric Anesthesia*, 2005, 15(3): 229–234. <https://doi.org/10.1111/j.1460-9592.2005.01427.x> PMID: 15725321
45. Shimbori H, Ono K, Miwa T, et al. Comparison of the LMA-ProSeal and LMA-Classic in children[J]. *British journal of anaesthesia*, 2004, 93(4): 528–531. <https://doi.org/10.1093/bja/ae238> PMID: 15298876
46. Burgard G, Möllhoff T, Prien T. The effect of laryngeal mask cuff pressure on postoperative sore throat incidence. *J Clin Anesth*. 1996 May; 8(3):198–201. [https://doi.org/10.1016/0952-8180\(95\)00229-4](https://doi.org/10.1016/0952-8180(95)00229-4) PMID: 8703453
47. Brimacombe J, Holyoake L, Keller C, et al. Pharyngolaryngeal, neck, and jaw discomfort after anesthesia with the face mask and laryngeal mask airway at high and low cuff volumes in males and females. *Anesthesiology*. 2000 Jul; 93(1):26–31. <https://doi.org/10.1097/00000542-200007000-00009> PMID: 10861142
48. Shin HW, Yoo HN, Bae GE, et al. Comparison of oropharyngeal leak pressure and clinical performance of LMA ProSeal and i-gel® in adults: Meta-analysis and systematic review. *J Int Med Res*. 2016 Jun; 44(3):405–18. <https://doi.org/10.1177/0300060515607386> PMID: 27009026
49. Maitra S, Baidya DK, Bhattacharjee S, et al. Evaluation of i-gel(™) airway in children: a meta-analysis. *Paediatr Anaesth*. 2014 Oct; 24(10):1072–9. <https://doi.org/10.1111/pan.12483> PMID: 25041224
